# Supplementary material
Source: publisher figshare collection journal article supplement (https://acs.figshare.com/ndownloader/files/28289154)
Supplement: Supplementary file 1 [file 28289154]

1 *Supporting information*

2  
3 **Evaluating Coarse-Grained MARTINI Force-Fields for Capturing the Ripple**  
4 **Phase of Lipid Membranes**

5  
6 ***Pradyumn Sharma<sup>1,‡</sup>, Rajat Desikan<sup>1,‡,†</sup>, K. Ganapathy Ayappa<sup>1,2,\*</sup>***

7  
8 <sup>1</sup>Department of Chemical Engineering, Indian Institute of Science, Bengaluru, India, 560012

9 <sup>2</sup>Centre for BioSystems Science and Engineering, Indian Institute of Science, Bengaluru, India,  
10 560012

11 <sup>‡</sup>Co-first authors

12 <sup>†</sup>Present address: Certara QSP, Certara UK Limited, Sheffield, UK, S1 2BJ

13 <sup>\*</sup>Corresponding author: K. Ganapathy Ayappa; E-mail: ayappa@iisc.ac.in

## 16 **Author contributions**

17

18 Conceptualization: R.D.; Data curation: P.S.; Formal analysis: R.D. and P.S.; Funding acquisition:  
19 K.G.A.; Investigation: P.S. and R.D.; Methodology: R.D. and P.S.; Project administration: P.S.  
20 and R.D.; Resources: P.S., R.D. and K.G.A.; Software (simulations, analysis code): P.S. and  
21 R.D.; Supervision: K.G.A.; Validation: P.S., R.D. and K.G.A.; Visualization: P.S. and R.D.; Writing  
22 – original draft: R.D. and P.S.; Writing – review & editing: R.D., P.S. and K.G.A.

23

24 All authors have given approval to the final version of the manuscript.

25

26 ‡These authors (P.S. and R.D.) contributed equally and are co-first authors.

27

28



30

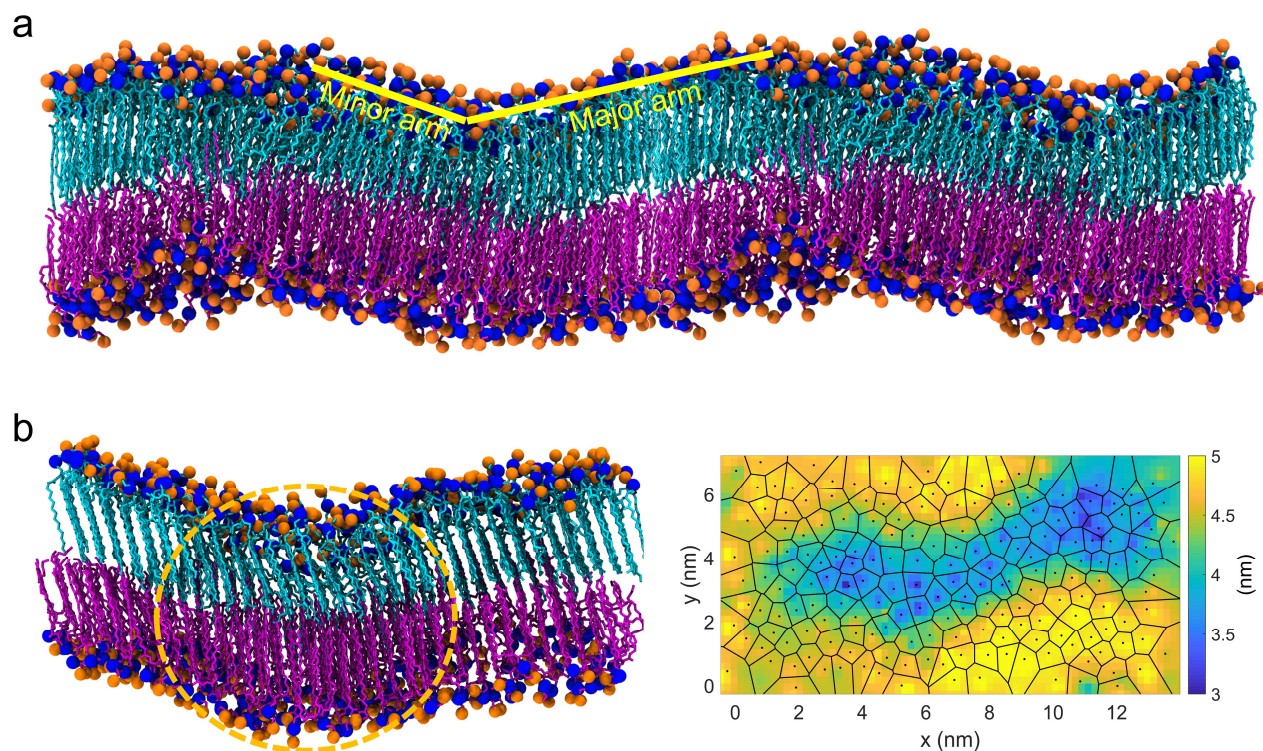

31

32 **Figure S1. An independent all-atom MD replicate reproduces the ripple phase. (a)** MD  
33 snapshot at time point IV from Figure 1a is periodically repeated along the x-axis, and the major  
34 and minor arms of the ripple in the upper leaflet are visually annotated for clarity. **(b)** Final  
35 snapshot (similar to time point IV in Figure 1) and corresponding Voronoi-thickness diagram from  
36 the independent simulated cooling replicate, using the same MD protocol as for the replicate in  
37 Figure 1, shows robust reproduction of the tilted ripple phase from all-atom simulations.

38

39

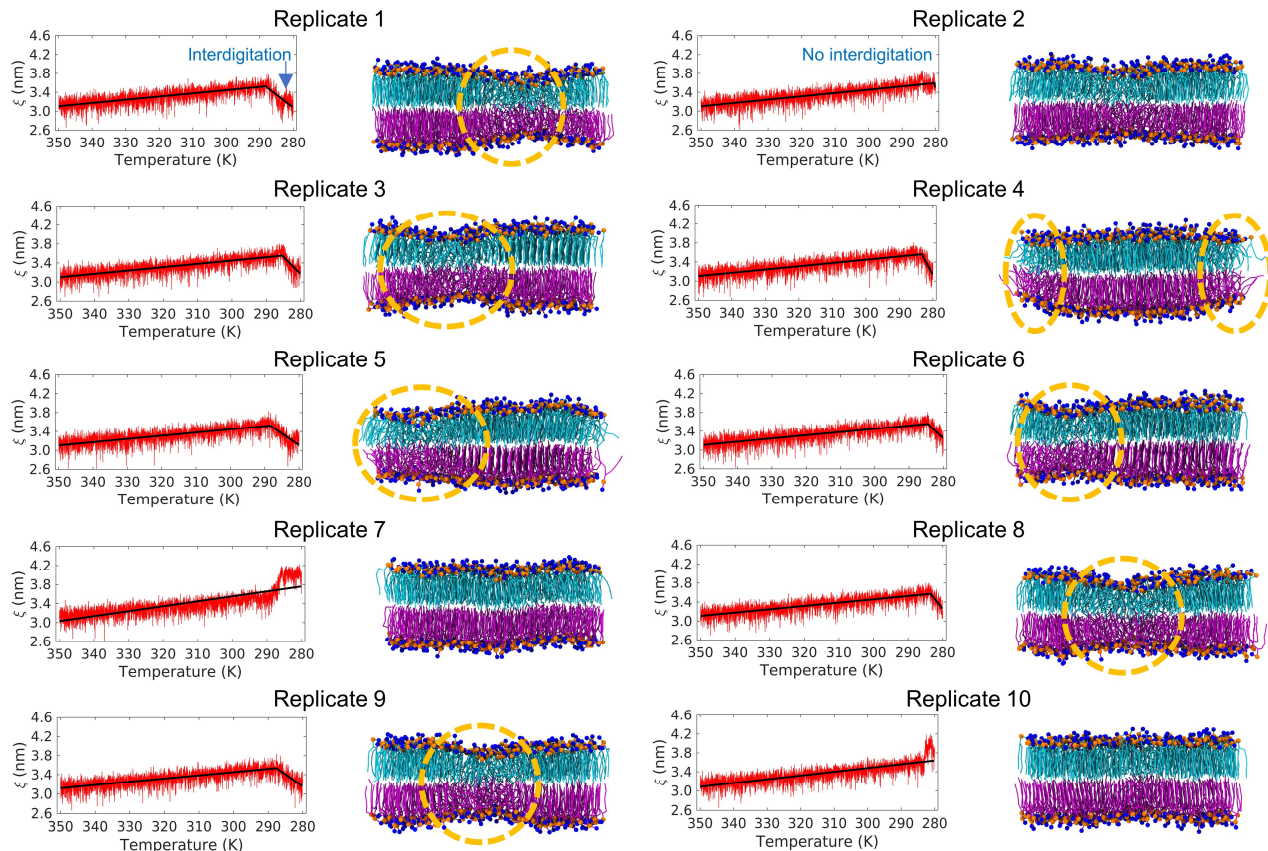

41

**Figure S2. Summary of 10 independent cooling MD replicates with the MARTINI2n FF.** Temporal evolution of the minimum inter-leaflet P-P distance ( $\xi$ ), a measure of the extent of interdigitation (Figure 1b;  $m_2 < 0$  – interdigitation, and  $m_2 > 0$  – no interdigitation (Methods, Eq. 1), are highlighted in replicates 1 and 2, respectively). For example, in replicate 1,  $m_1 > 0$  for  $T > 288.3$  K,  $m_2 < 0$  for  $T < 288.3$  K and  $\tau = 288.3$  K. Final snapshots corresponding to time point III at the end of cooling simulations with MARTINI2n DPPC membranes are shown for all the 10 independent MD replicates. The interdigitated domains in replicates which exhibit ripple-like structures are marked with yellow dashed circles.

50

51

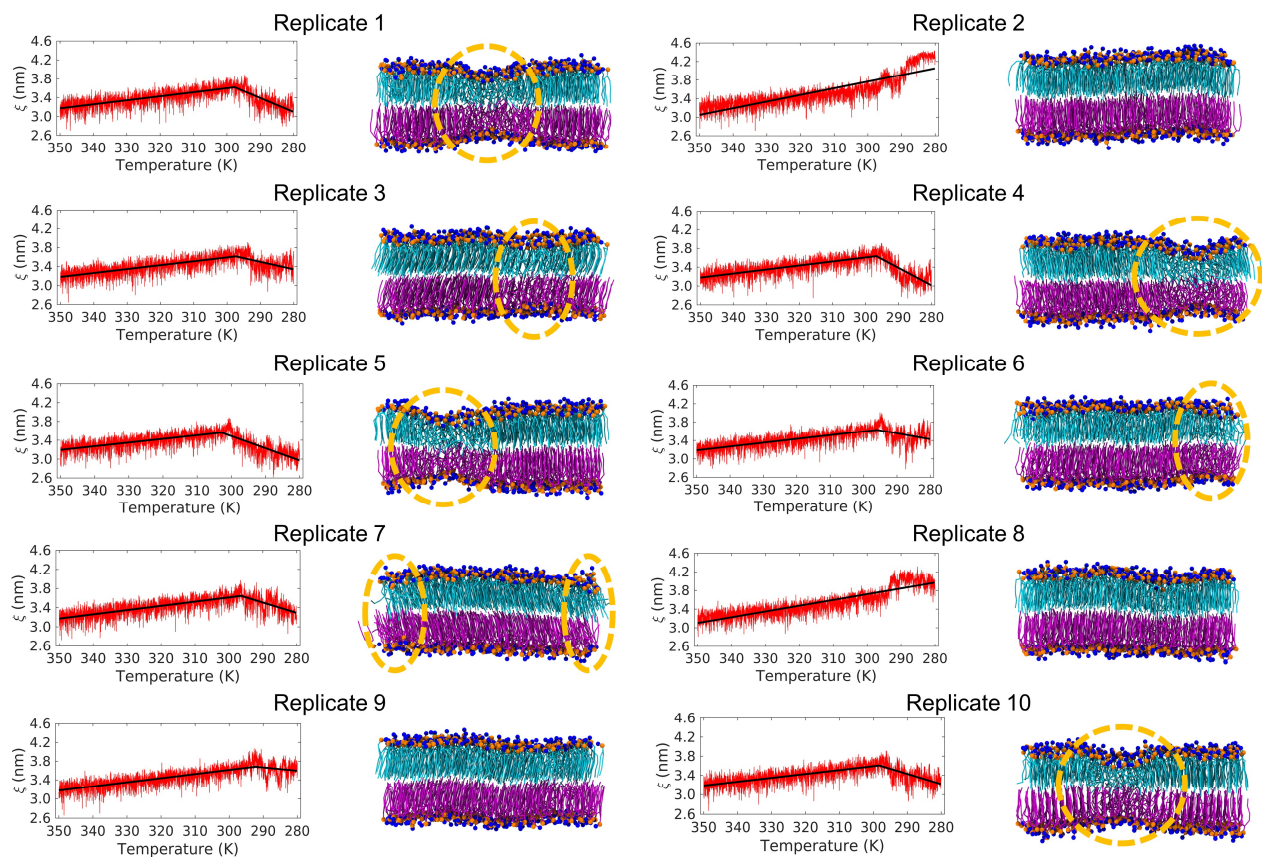

54 **Figure S3. Summary of 10 independent cooling MD replicates with the MARTINI2On FF.**  
55 Same as Figure S2, but with the MARTINI2On FF variant.



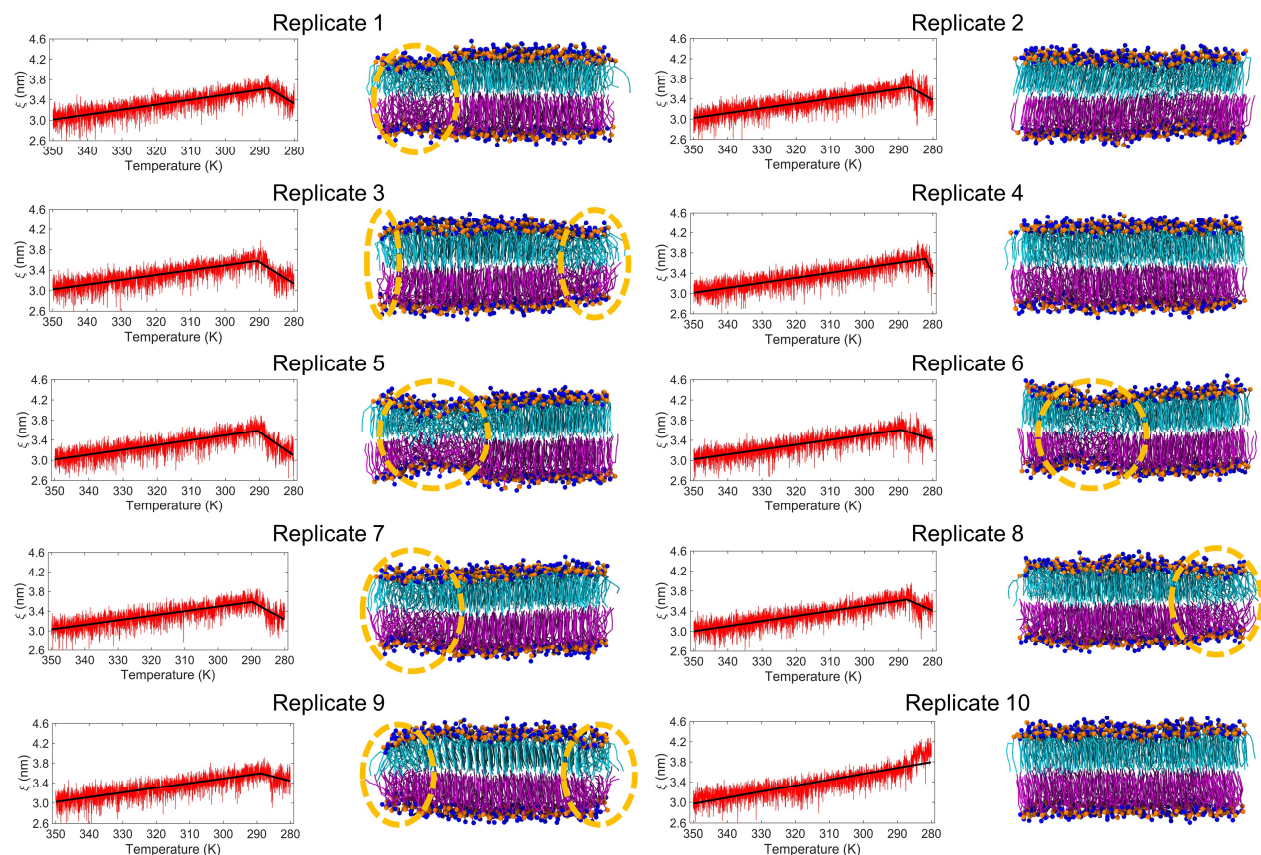

59

60 **Figure S4. Summary of 10 independent cooling MD replicates with the MARTINI3a FF.** Same  
 61 as Figure S2, but with the MARTINI3a FF variant. Note that while the  $\xi$  trends for replicates 2 and  
 62 4 appear to indicate the onset of ripple formation, it can be inferred from visual inspection that this  
 63 is due to very few interdigitating lipids and not due to the formation of a ripple-like domain. Hence,  
 64 these replicates were not counted as ripple-like states.

65

66

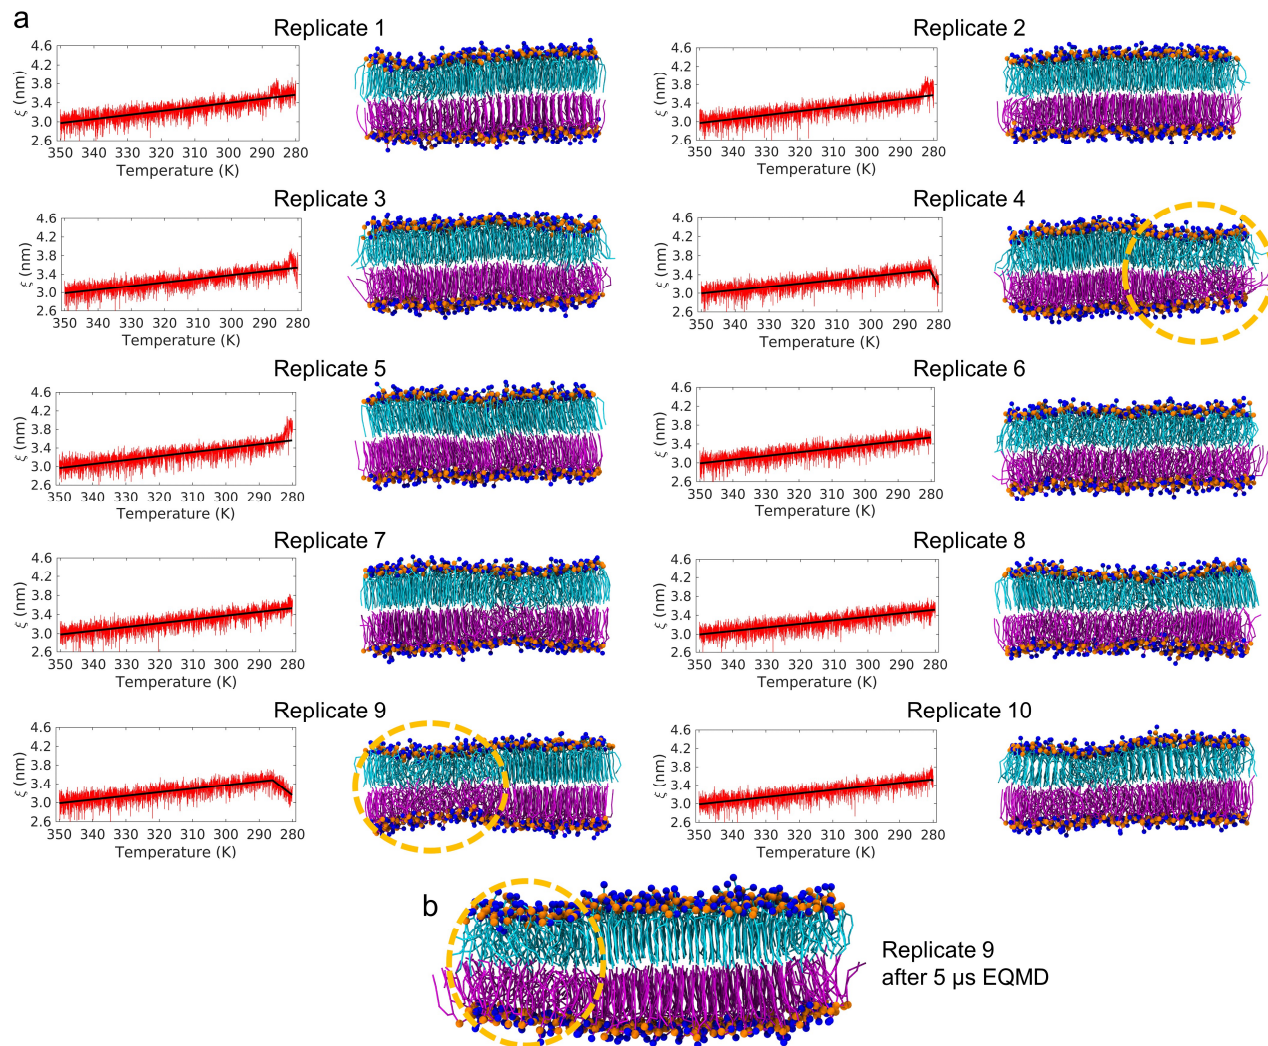

**Figure S5. Summary of 10 independent cooling MD replicates with the MARTINI3b FF. (a)** Same as Figure S2, but with the MARTINI3b FF variant. **(b)** Replicate 9 was further subjected to 5  $\mu$ s EQMD to confirm that the ripple-like domains were stable at this timescale.

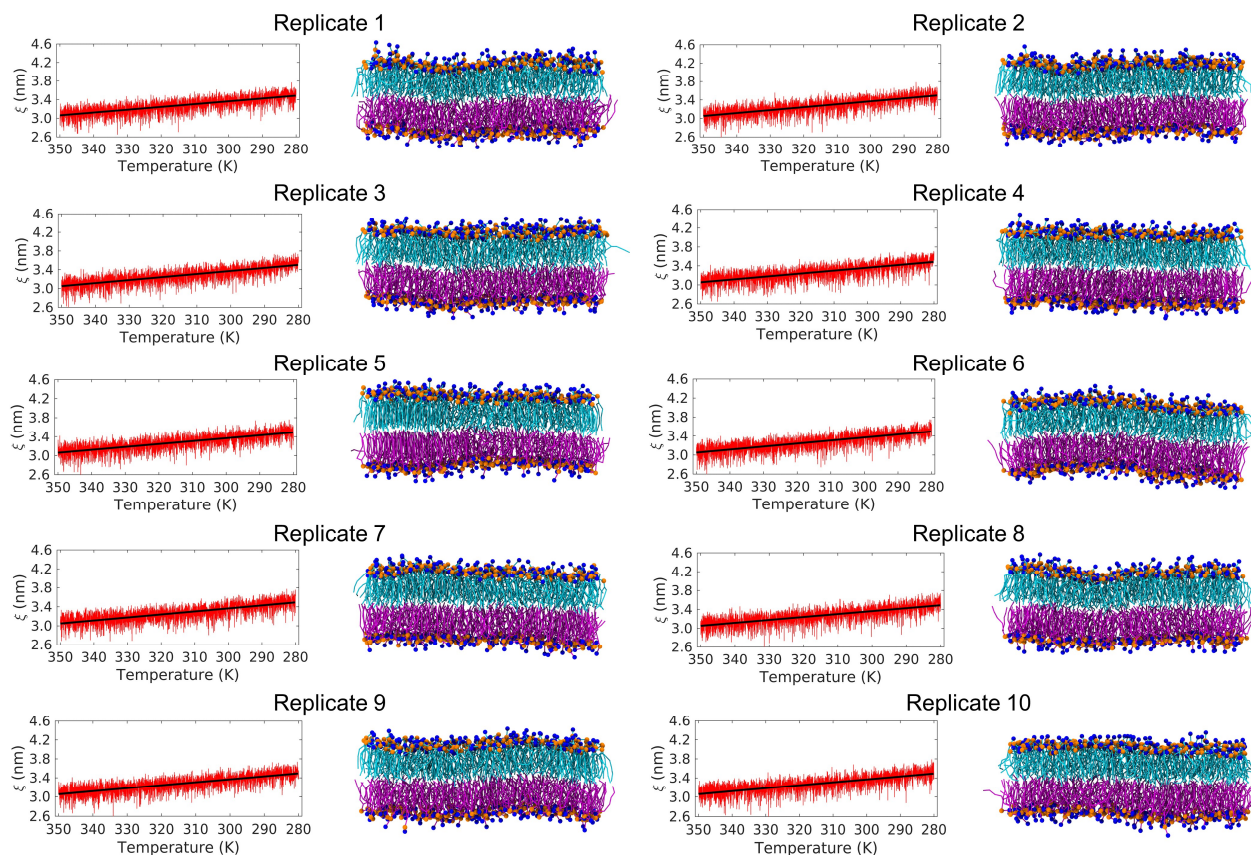

75

76 **Figure S6. Summary of 10 independent cooling MD replicates with the MARTINI2p FF.**  
 77 Same as Figure S2, but with the MARTINI2p FF variant. Note that while none of the  $\xi$  plots show  
 78 ripple-like domain formation during the cooling phase, replicate 5 formed shallow interdigitated  
 79 ripple-like domains during the 5  $\mu$ s EQMD (Figure 2f).

80

81



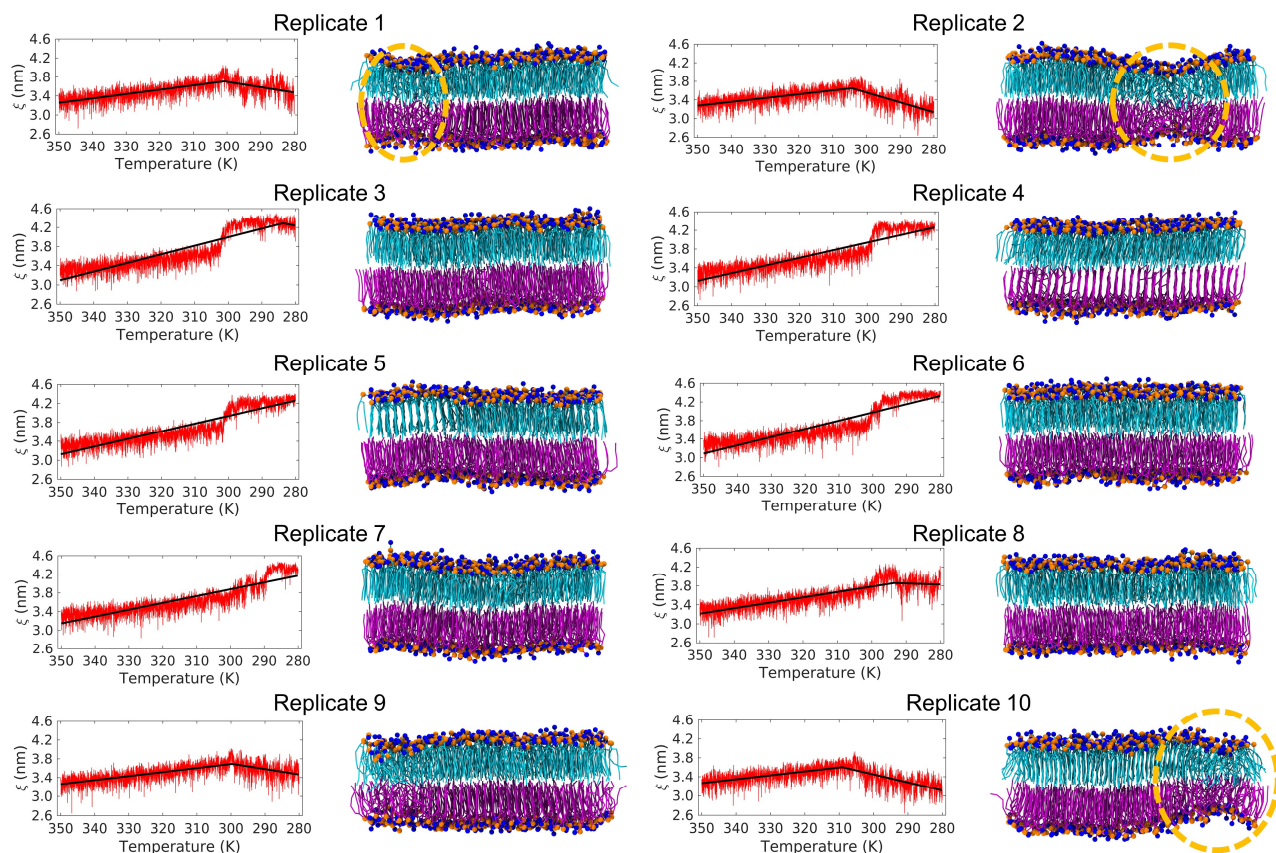

83

84 **Figure S7. Summary of 10 independent cooling MD replicates with the MARTINI2Op FF.**  
 85 Same as Figure S2, but with the MARTINI2Op FF variant. In replicate 9, while we observed a  $\xi$   
 86 trend similar to ripple-like domain formation, visual inspection yielded no interdigitated domains,  
 87 and hence this replicate was not considered as a ripple-like state.

88

89

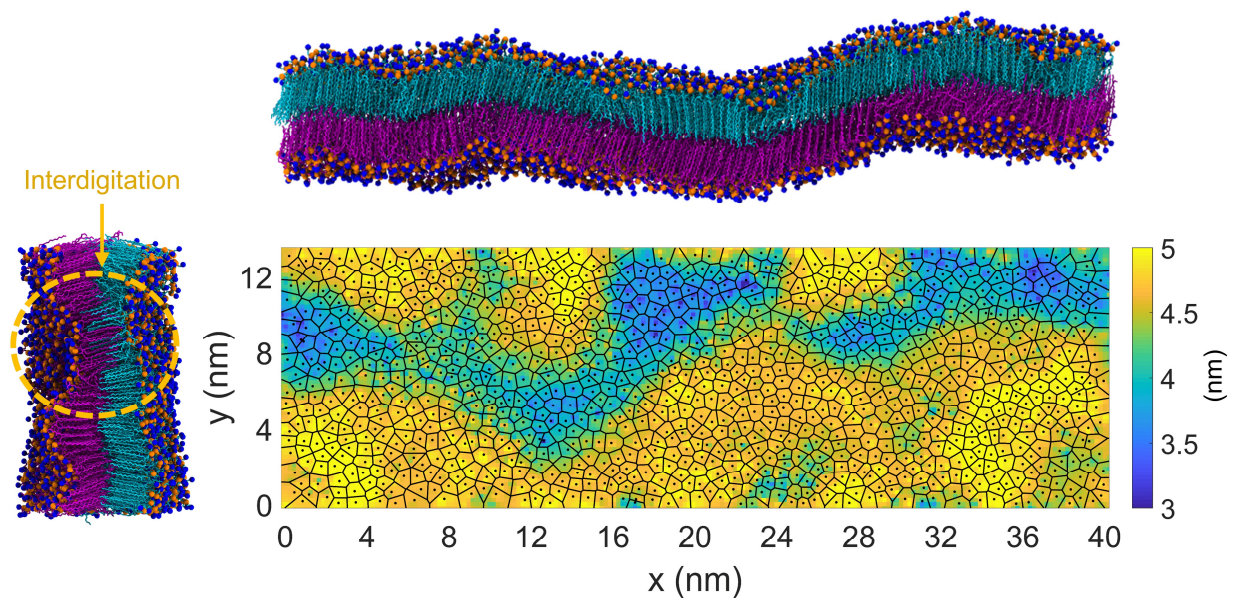

91

92 **Figure S8. Independent all-atom simulation replicate also shows ripple formation in a large**  
93 **DPPC membrane.** Similar to Figure 3, the final snapshot (front view) of a large DPPC membrane  
94 after being cooled to 290 K, and its corresponding Voronoi-thickness map, show the formation of  
95 symmetric, and asymmetric-interdigitated, ripple structures along the X-axis (longer box  
96 dimension) and Y-axis (shorter box dimension), respectively. Note that the non-interdigitated  
97 symmetric ripple along the X-axis is indiscernible from the Voronoi-thickness map.

98

99



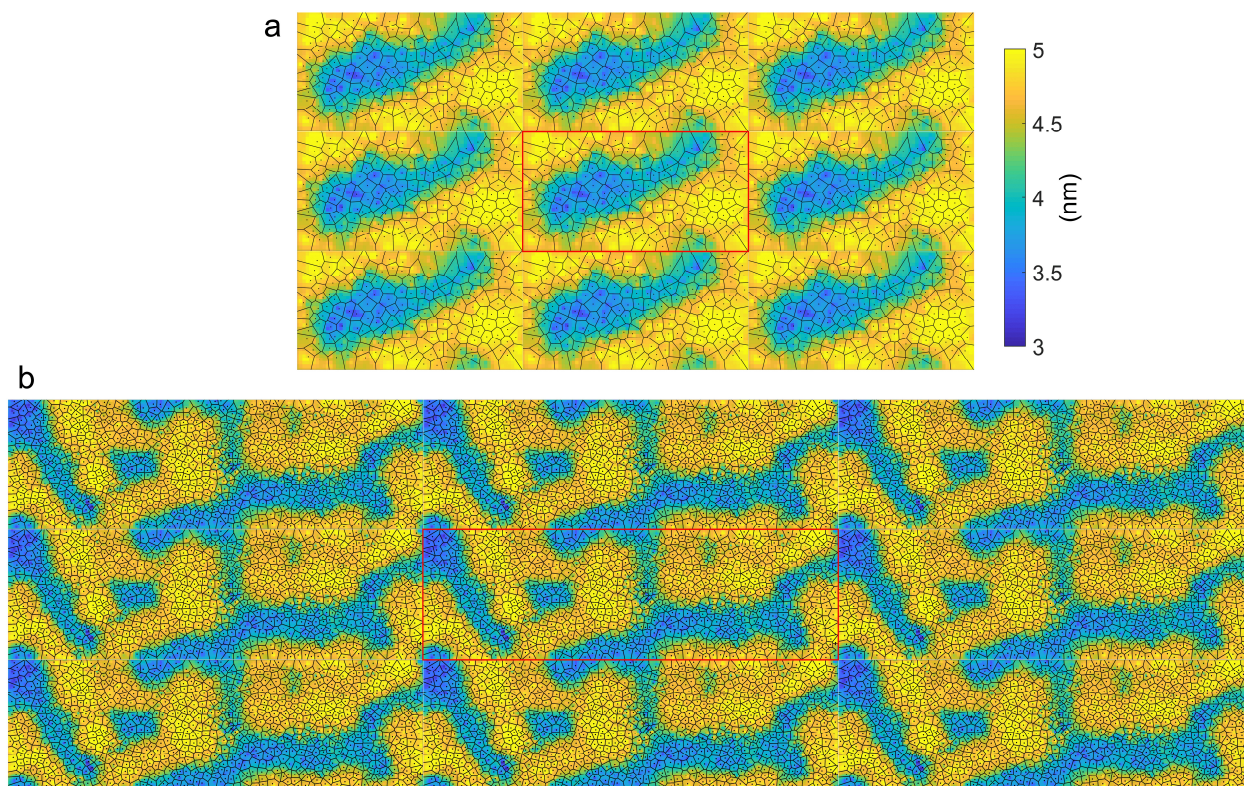

101

102 **Figure S9. Periodically repeated Voronoi-thickness modulation heatmaps of atomistic**  
103 **DPPC membranes.** Voronoi-thickness modulation heatmaps after simulated cooling of atomistic  
104 **(a)** 368-lipid (Figure 1), and **(b)** 2208-lipid (Figure 3) DPPC membranes are shown with periodic  
105 images (original simulation box in the middle shown with a red border; same thickness colorbar  
106 applies for both systems). The reticulated, interdigitated domains observed in the larger DPPC  
107 membrane are in contrast with the island-like isolated domains seen in the smaller membrane.

108

109



MARTINI2n, after cooling a 2204-lipid rectangular membrane from 350 K to 280 K

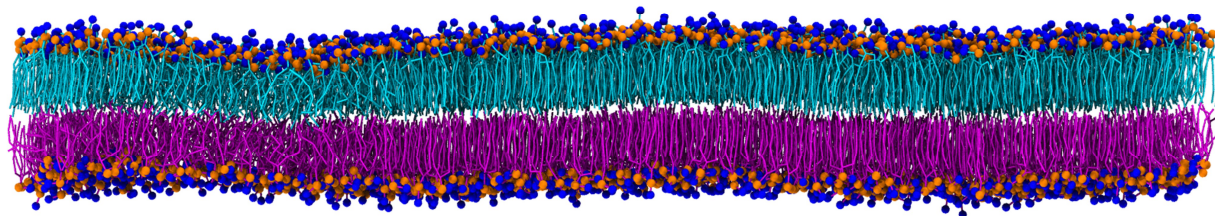

MARTINI2On

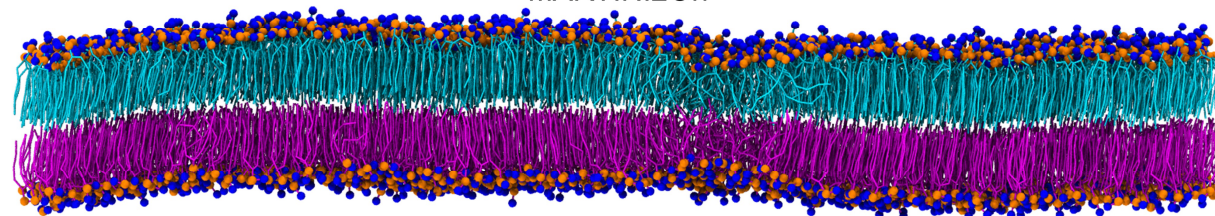

MARTINI3a

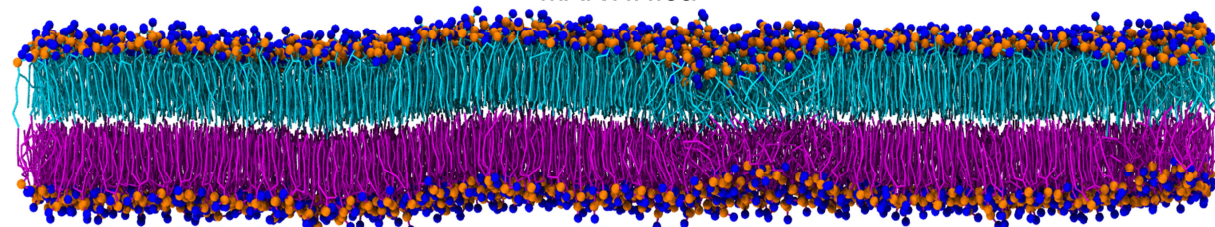

MARTINI3b – Replicate 1

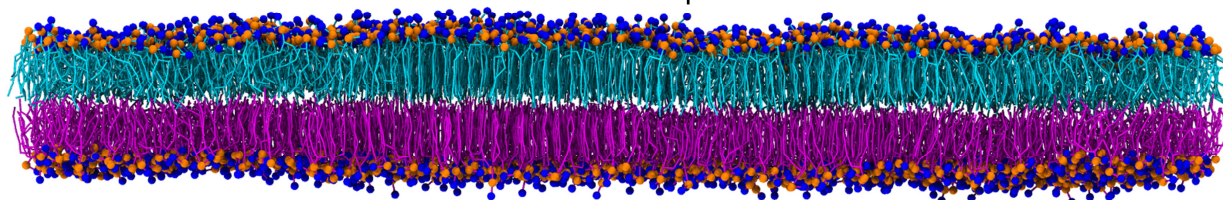

MARTINI3b – Replicate 2

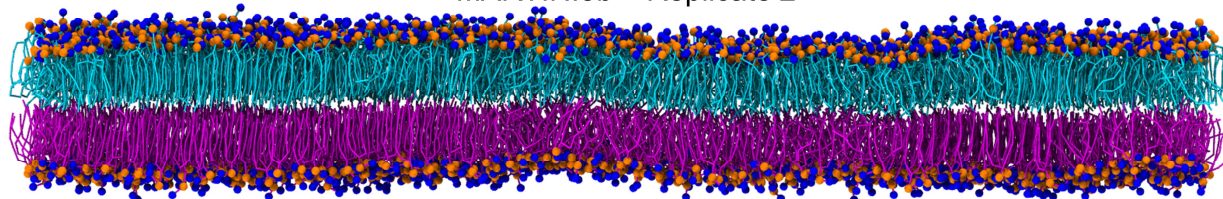

**Figure S10 Independent MD replicates confirm the lack of ripple formation in large MARTINI DPPC membranes.** Independent MD replicates similar to Figure 4, where large, rectangular, MARTINI2n, MARTINI2On, MARTINI3a, and MARTINI3b DPPC membranes, initially pre-equilibrated in the fluid phase at 350 K, exhibited direct transformation into the straight gel phase upon cooling to 280 K without forming either interdigitated or symmetric ripple-like structures (unlike the behaviour for smaller MARTINI membranes in Figure 2). Note: these



118 membranes were not subject to further EQMD after cooling, and thus a few minor domains remain  
119 in the  $L_\alpha$  state. These are expected to disappear upon further equilibration.

120

---

MARTINI2On, a 6728-lipid square  $L_\alpha$  membrane, equilibrated at 350 K for 100 ns

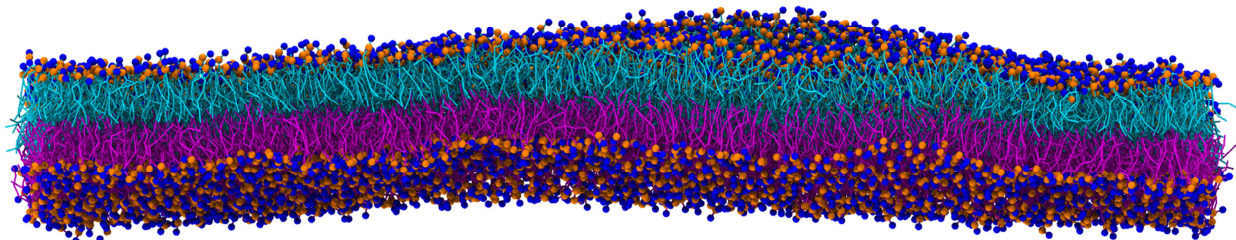

Replicate 1, after cooling to 280 K

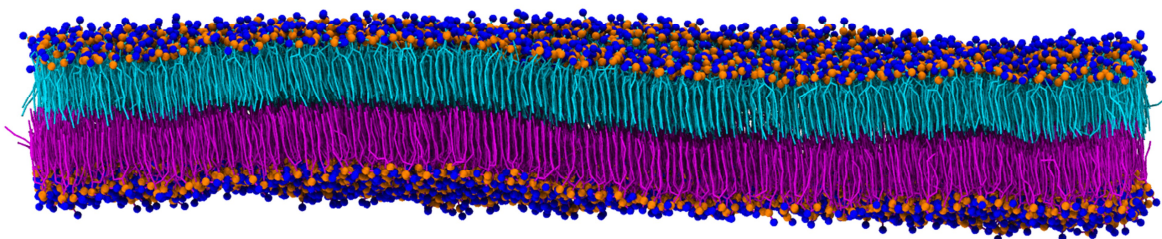

Replicate 2, after cooling to 280 K

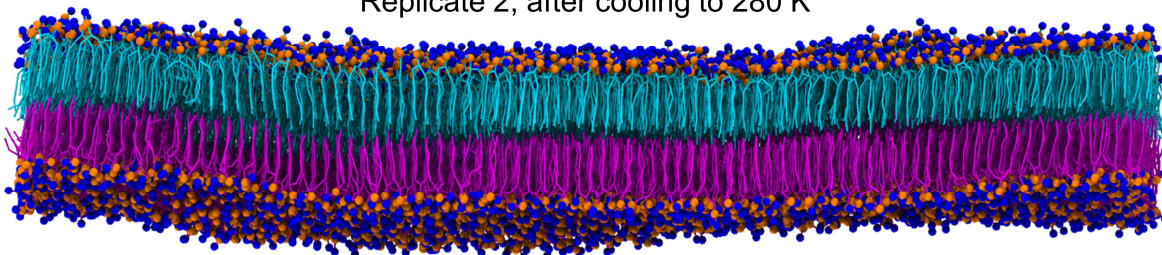

121

122 **Figure S11 Large square MARTINI DPPC membranes also exhibit a lack of ripple formation.**  
123 The influence of membrane geometry on ripple formation was also tested by cooling two large,  
124 square, MARTINI2On membrane replicates, from 350 K to 280 K. Similar to the rectangular  
125 membrane patches in Figure S10, both square membrane replicates directly froze into the gel  
126 phase without forming ripple membranes.

127

128

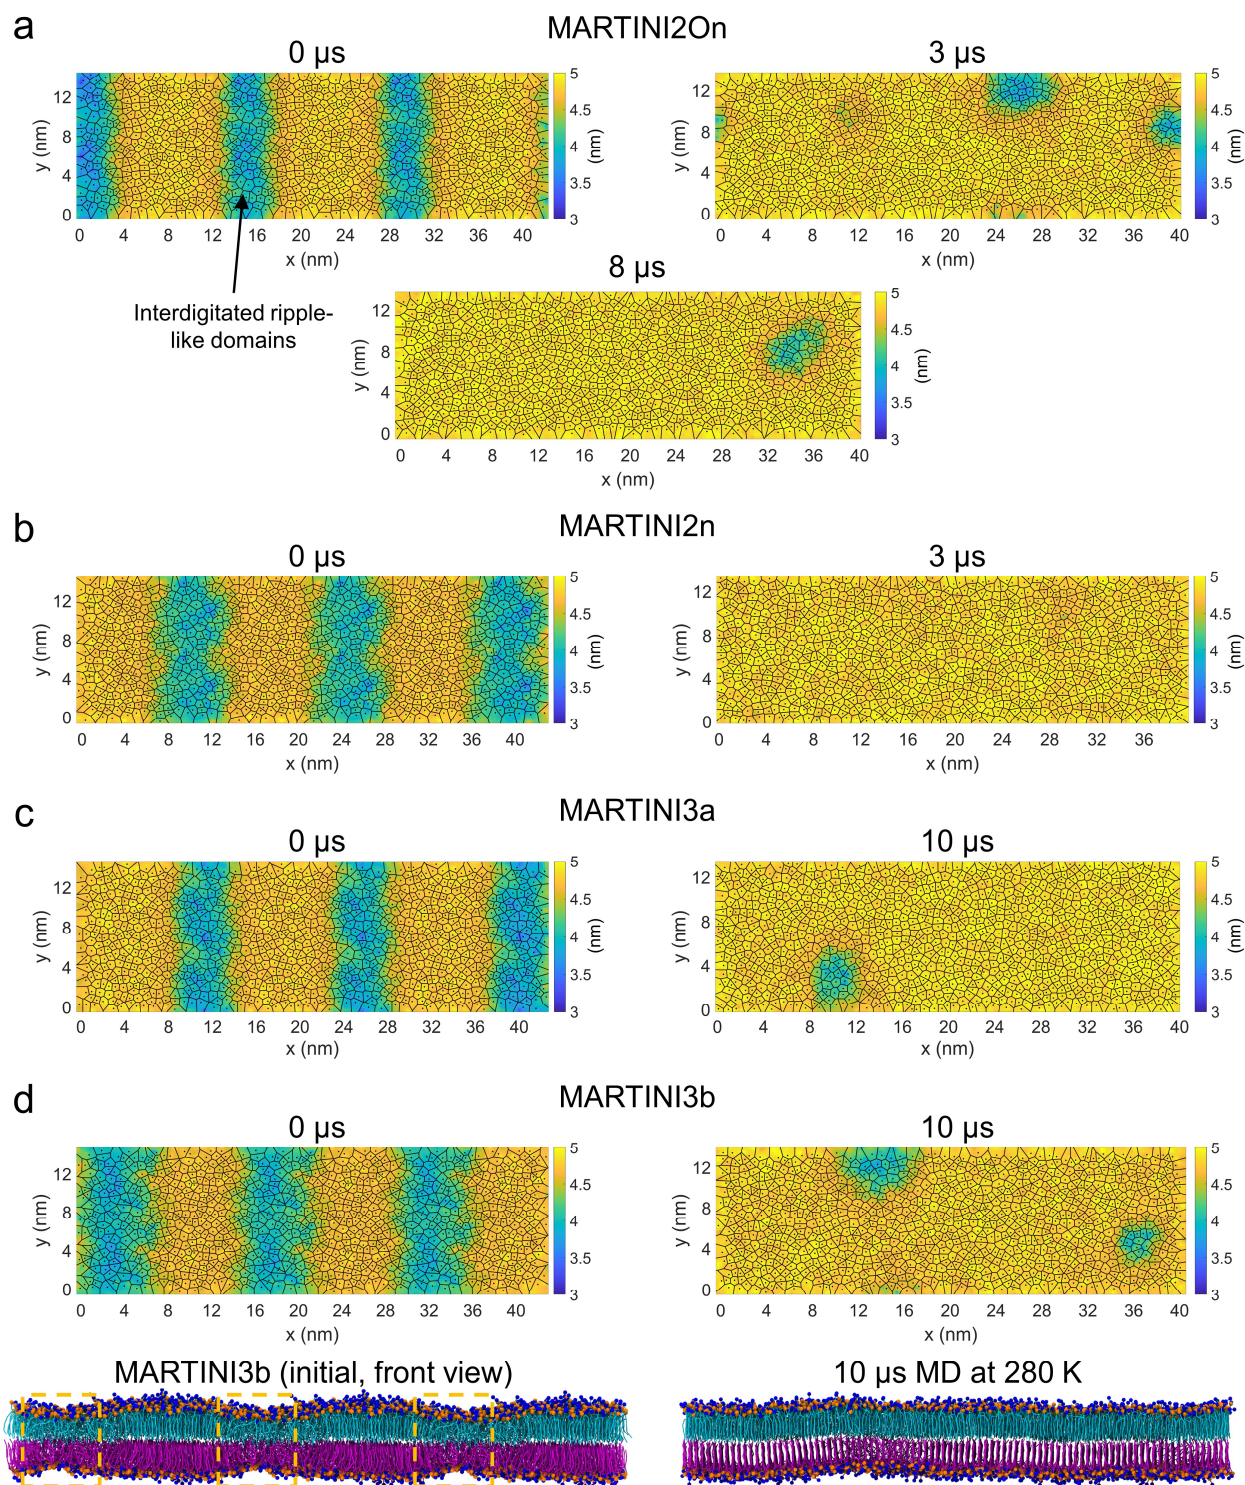

130

131 **Figure S12. Voronoi-thickness maps from MD of large MARTINI membranes.** Voronoi-  
 132 thickness map from constant temperature MD of large (a) MARTINI2On, (b) MARTINI2n, (c)  
 133 MARTINI3a, and (d) MARTINI3b membranes at 280 K, corresponding to MD snapshots in Figure  
 134 5 (snapshots for MARTINI3b shown here). Simulations starting with a periodic ripple-like  
 135 configuration (0  $\mu$ s), shows progressive loss of the interdigitated ripple-like domains and formation



of the gel phase by 8  $\mu$ s and 10  $\mu$ s for the MARTINI2On and MARTINI3a/b membranes, respectively. Notably, the MARTINI2n membrane shows complete loss of interdigitation by 3  $\mu$ s. While the blue regions at the initial time points (0  $\mu$ s) correspond to interdigitated domains, they could correspond to either metastable interdigitated (continuously decreasing), or non-interdigitated but partially melted domains, at the final time points. This distinction can be made by simultaneously comparing the MD snapshots (Figure 5 for MARTINI2On, MARTINI2n, MARTINI3a, and above for MARTINI3b) with the Voronoi-thickness maps above.

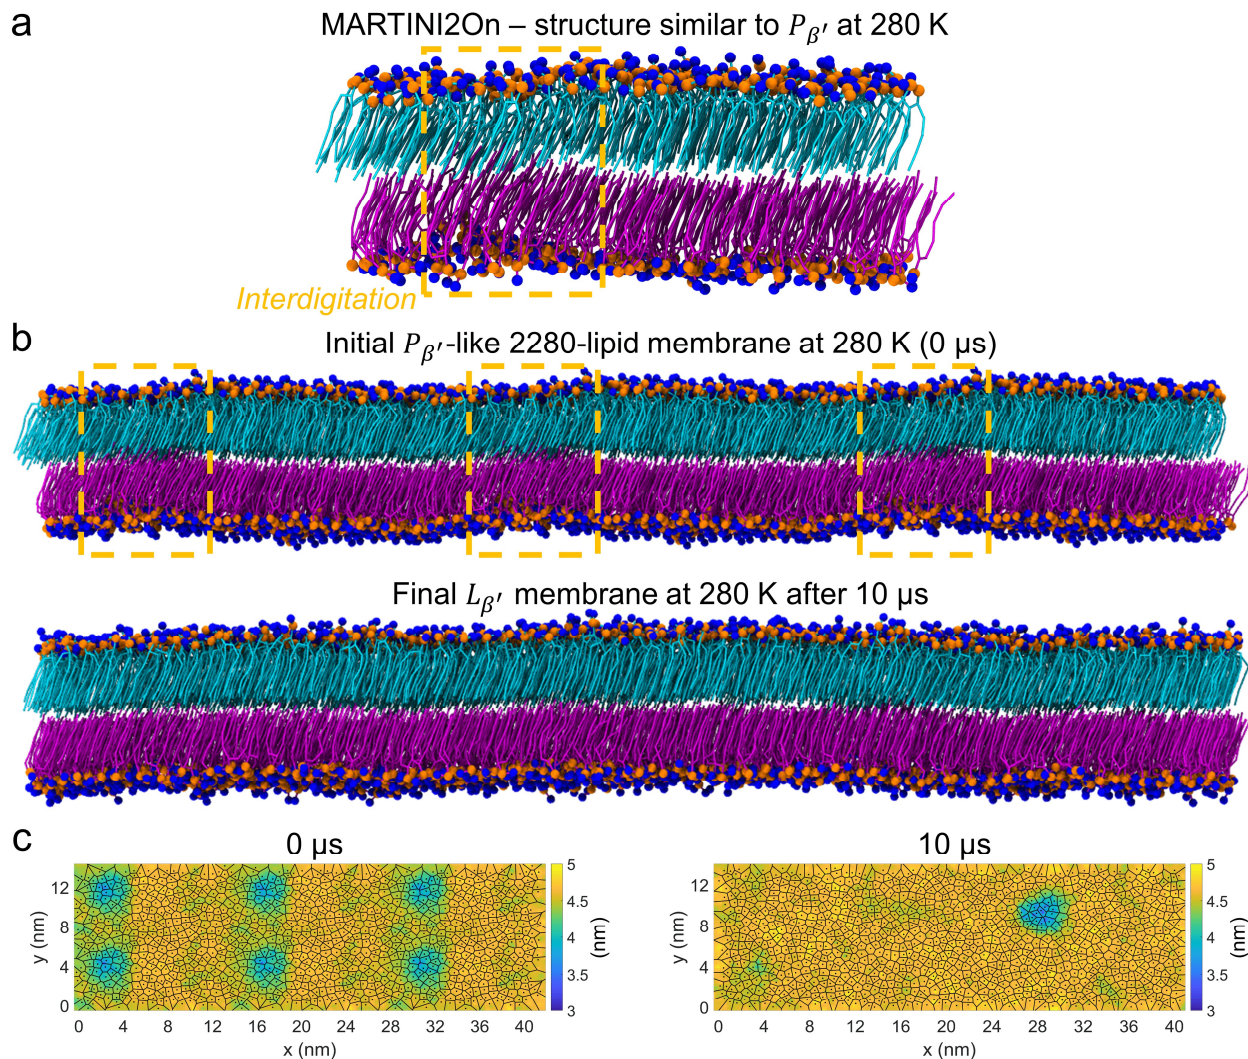

**Figure S13. The tilted ripple-like state of a MARTINI2On membrane is also a finite size artefact.** Simulated cooling of replicate 3 with the MARTINI2On FF (from Figure S3) showed the formation of an interdigitated domain in an otherwise  $L_{\beta'}$  membrane at 280 K. The interdigitation was enhanced upon performing constant temperature MD for 5  $\mu$ s: final snapshot shown in (a). (b) To explore whether this was a finite size effect or a true ripple phase, the smaller membrane was replicated 6x across periodic boundaries to create a larger membrane with repeated ripple-like domains (snapshot at 0  $\mu$ s), similar to Figure 5a. After 10  $\mu$ s constant temperature MD, the interdigitated ripple-like regions were greatly diminished, thus confirming that the ripple-like state in (a) was indeed a finite size artefact. (c) Voronoi-thickness maps pertaining to MD snapshots in (b), where regions of lower thickness in blue indicate the ripple-like domains.
